# Supplementary material for: Global estimates of 100-year return values of daily precipitation from ensemble weather prediction data
Source: Copernicus journal article supplement (doi:10.5194/egusphere-2023-2057), 2023-10-23
Supplement: Supplementary file 1 [file egusphere-2023-2057-supplement.pdf]

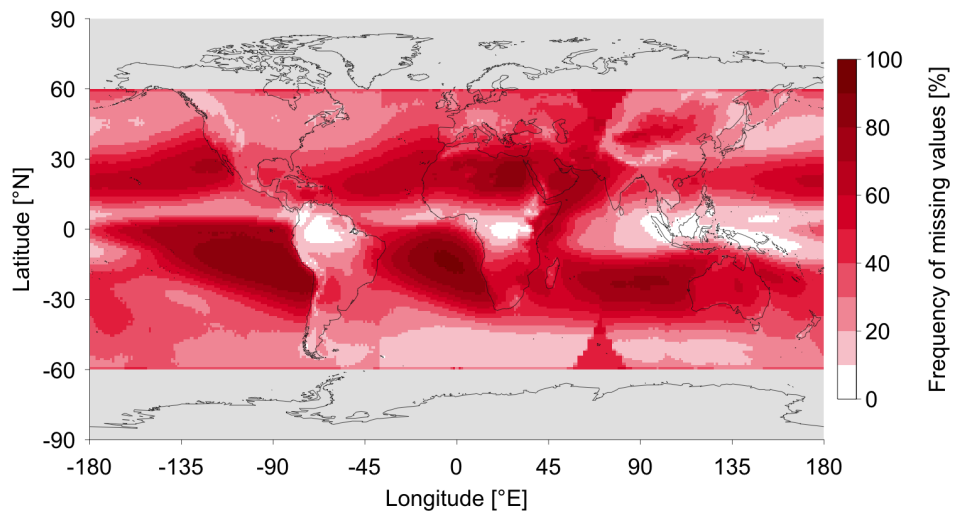

**Figure S1.** Frequency of missing values (either dry days or days when satellite data are not available) in the original PERSIANN observations for a data period of 1983 to 2021.

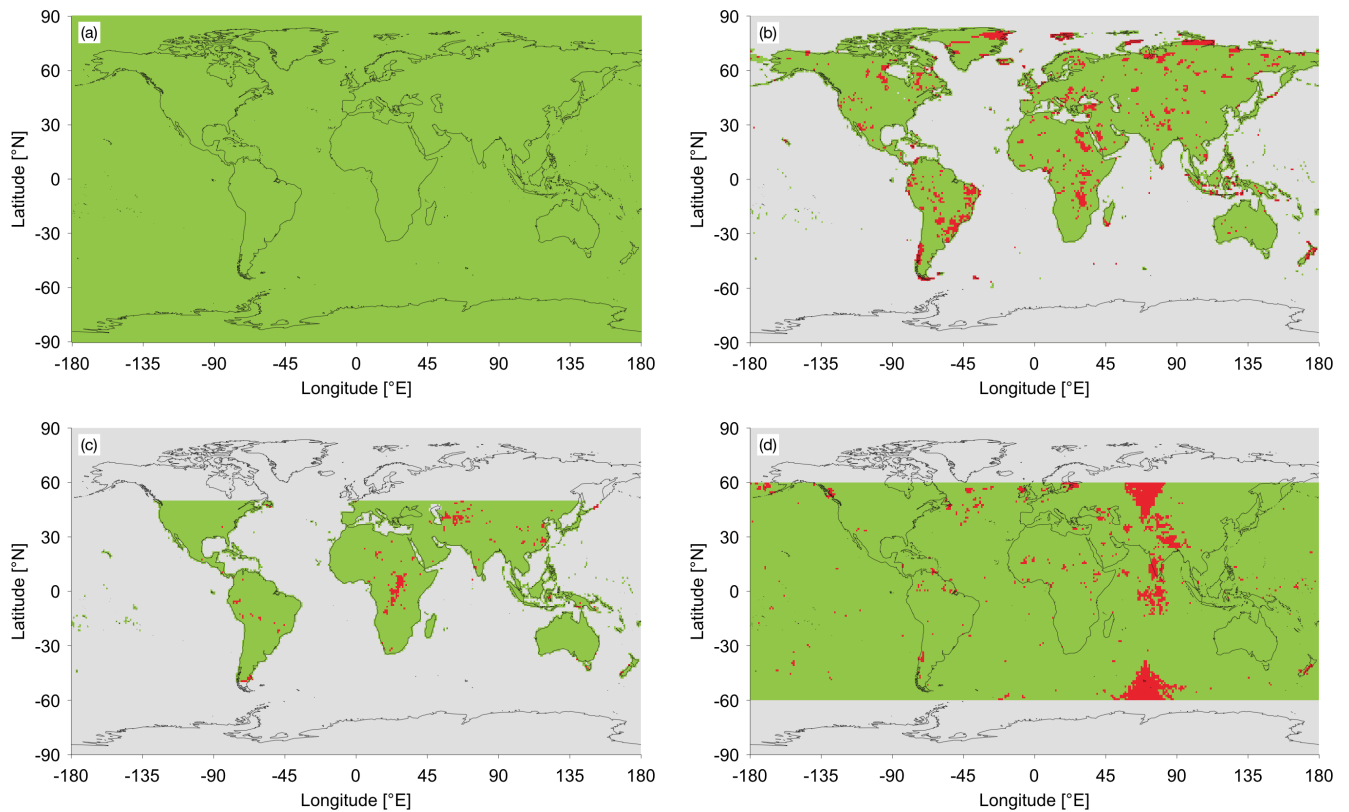

**Figure S2.** Spatial distribution of statistical significant temporal trends (red grid points), obtained from the FDR test of Benjamini and Hochberg (1995), as described in Ventura et al. (2004), applied on multiple  $p$  values associated with the Mann-Kendall trend tests applied for the 99.9th percentile of daily precipitation for (a) the EPS data and the (b) REGEN, (c) CHIRPS and (d) PERSIANN observations.
